# Supplementary material
Source: Springer Nature journal article supplement (https://www.springermedizin.de/resource/supplementary/12890_2013_519_MOESM1_ESM.pdf/9505686)
Supplement: MOESM1 [file 9505686]

**40 OSAS Patients**

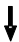

**CPAP TITRATION**

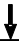

**Training and information  
on therapy**

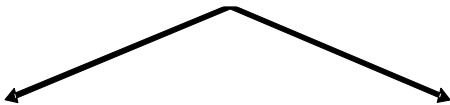

**Without support**

**N=20**

**With support**

**N=20**

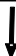

**Telephone Interview:  
1<sup>st</sup> week and 30<sup>th</sup> day**

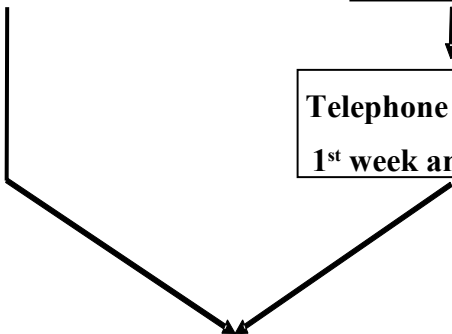

**Download compliance data  
and control of BMI and ESS:  
3<sup>rd</sup>, 6<sup>th</sup> and 12<sup>th</sup> month**
